# Supplementary material for: Acquired Resistance to Combination Treatment with Temozolomide and ABT-888 Is Mediated by Both Base Excision Repair and Homologous Recombination DNA Repair Pathways
Source: Oxford University Press journal article supplement (doi:10.1158/1541-7786.mcr-09-0299), 2009-10-14
Supplement: 15417786mcr090299-sup-supplementary_data.pdf [file 15417786mcr090299-sup-supplementary_data.pdf]

## Figure Legend

Supplement Figure 1. Heat map of gene expression changes in of HCT116R cells. Genes that are differentially regulated in all three resistant clones (more than 1.5 fold) were colored based on the fold change relative to that in parental HCT116 cells.

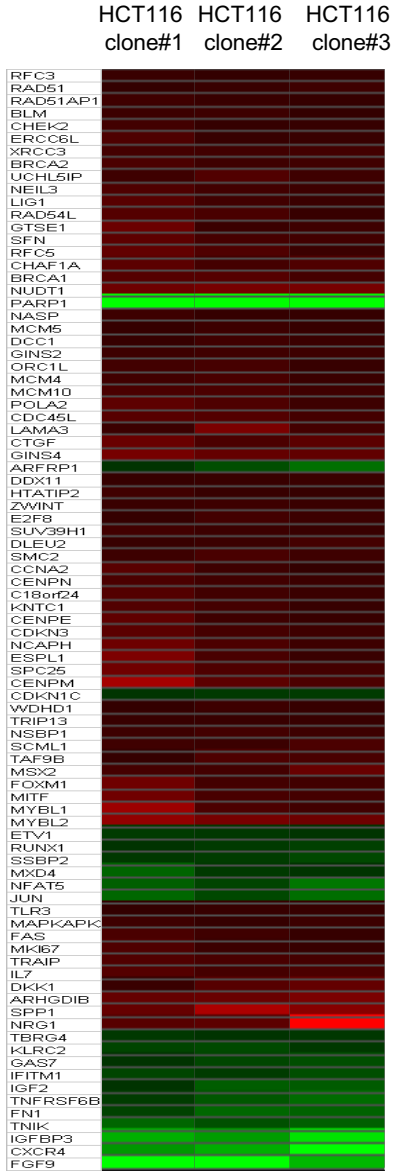

Response  
to DNA  
damage

DNA  
replication

Cell cycle

Transcription

Signaling

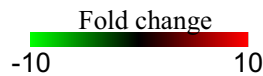

HCT116 HCT116 HCT116  
clone#1 clone#2 clone#3

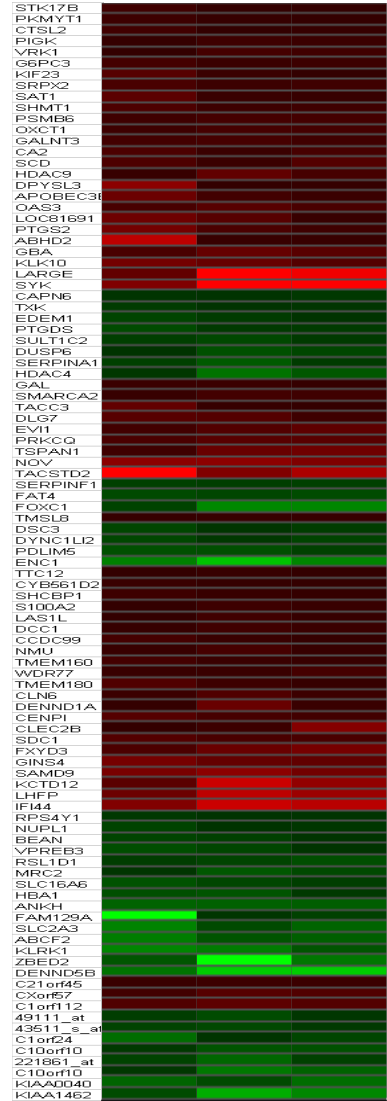

Catalytic

Cell  
proliferation

Cytoskeleton

Other

EST's

Suppl. Fig. 1
